# Supplementary material for: The effects of the side-chain length of non-fullerene acceptors on their performance in all-small-molecule organic solar cells
Source: Royal Society of Chemistry journal article supplement (doi:10.1039/d2tc01131j), 2022-01-01
Supplement: d2tc01131j1.pdf [file d2tc01131j1.pdf]

## Supporting Information

### **Effects of side-chain length of non-fullerene acceptors on performance in all-small-molecule organic solar cells**

*Fangfang Huang,<sup>a</sup> Lingxian Meng,<sup>a</sup> Changzun Jiang,<sup>a</sup> Huazhe Liang,<sup>a</sup> Yang Yang,<sup>b</sup> Jian Wang,<sup>b</sup> Xiangjian Wan,<sup>a</sup> Chenxi Li,<sup>a</sup> Zhaoyang Yao,<sup>a</sup> Yongsheng Chen.<sup>a,\*</sup>*

*<sup>a</sup>State Key Laboratory and Institute of Elemento-Organic Chemistry, The Centre of Nanoscale Science and Technology and Key Laboratory of Functional Polymer Materials, Renewable Energy Conversion and Storage Center (RECAST), College of Chemistry, Nankai University, Tianjin, 300071, China.*

*<sup>b</sup>The Institute of Seawater Desalination and Multipurpose Utilization, Ministry of Natural Resources (Tianjin), Tianjin 300192, P. R. China.*

#### Content

1. Materials and Synthesis
2. Instruments and Measurements
3. Device Fabrication
4. Figures and Tables
5. NMR and HR-MS
6. Reference

## 1. Materials and Synthesis

All reactions and manipulations were carried out under argon (Ar) atmosphere with use of standard Schlenk techniques. All starting materials and solvent were purchased from commercial sources without any purification unless stated otherwise. The central core (compound **1**) with two *n*-octyl was synthesized according previous reports.<sup>1-3</sup>

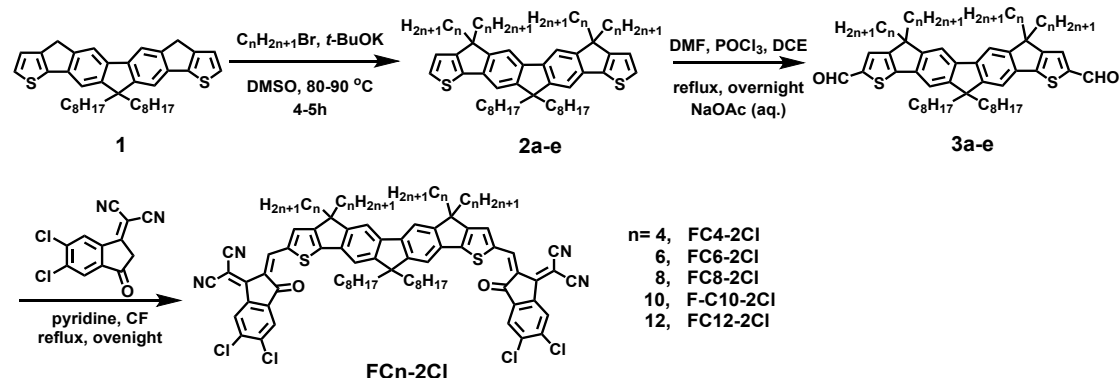

**Scheme S1.** The synthetic route of **FCn-2Cl** (n=4, 6, 8, 10, 12).

### *General procedure for the synthesis of compound 2*

A solution of compound **1** (0.29 g, 0.50 mmol) in dry DMSO (20 mL) was heated at  $80\text{ }^{\circ}C$ . Sodium tert-butoxide (0.56 g, 4.99 mmol) dissolved in dry DMSO (15 ml) was added to the above mixture. After the reaction mixture was stirred at  $80\text{ }^{\circ}C$  for 1 h, alkyl bromide (4.00 mmol) was added dropwise. The mixture was further stirred at  $90\text{ }^{\circ}C$  for 4 h. After cooling to room temperature, the reaction was quenched by water and extracted with ethyl ether ( $30\text{ ml} \times 3$ ) and brine ( $50\text{ ml} \times 3$ ). After being dried over  $MgSO_4$ , the organic layer was removed by reduced pressure and the residue was simply

purified by column chromatography on silica gel (petroleum ether) to afford sticky yellow product. The excess alkyl bromide and the product are difficult to separate, we did a crude NMR characterization and MS characterization, and then the products would be used for the next step. The excess alkyl bromide does not affect the next reaction.

*General procedure for the synthesis of compound 3*

POCl<sub>3</sub> (0.18 mL) was added drop by drop to DMF (2 mL) at 0 °C under the protection of argon and then stirred at 0 °C for 1 h. And then, the reaction flask was moved to room temperature and stirred another 4 h to gain the Vilsmerier reagent. The Vilsmerier reagent was added into a 1,2-dichloroethane (30 mL) solution of compound **1** (0.41 mmol). The above reaction mixture was stirred at room temperature for 1 h and then heated to 80 °C overnight. The mixture was cooled to room temperature and quenched with saturated CH<sub>3</sub>COONa (aq.), and then extracted with CH<sub>2</sub>Cl<sub>2</sub> (50 mL×3). The combined organic layer was dried over anhydrous Na<sub>2</sub>SO<sub>4</sub> and purified by silica gel (petroleum ether/dichloromethane = 1/1, v/v) to yield product.

**3a**: bright yellow solid (78%) <sup>1</sup>H NMR (400 MHz, CDCl<sub>3</sub>, δ): 9.92 (s, 2H), 7.66 (s, 2H), 7.66 (s, 2H), 7.48 (s, 2H), 2.13-2.03 (m, 8H), 1.97-1.89 (m, 4H), 1.19-0.85 (m, 40H), 0.76 (t, 18H). <sup>13</sup>C NMR (100 MHz, CDCl<sub>3</sub>, δ): 183.0, 155.5, 154.9, 152.3, 151.4, 144.9, 141.0, 136.1, 130.6, 115.1, 114.0, 54.8, 54.0, 40.5, 38.9, 31.7, 29.8, 29.7, 29.2, 29.1, 26.6, 23.7, 23.1, 22.6, 14.0, 13.9. MS (MALDI-TOF): calculated for C<sub>57</sub>H<sub>78</sub>O<sub>2</sub>S<sub>2</sub> [M<sup>+</sup>], 858.54; found: 858.55.

**3b**: bright yellow solid (77%)  $^1\text{H}$  NMR (400 MHz,  $\text{CDCl}_3$ ,  $\delta$ ): 9.91 (s, 2H), 7.65 (s, 4H), 7.47 (s, 2H), 2.12-2.03 (m, 8H), 1.97-1.90 (m, 4H), 1.13-0.86 (m, 56H), 0.76 (t, 18H).  $^{13}\text{C}$  NMR (100 MHz,  $\text{CDCl}_3$ ,  $\delta$ ): 183.0, 155.5, 154.9, 152.3, 151.4, 141.1, 136.1, 130.6, 115.1, 114.0, 54.8, 54.0, 40.5, 39.0, 31.9, 31.8, 31.5, 29.9, 29.7, 29.6, 29.2, 29.1, 24.3, 23.7, 22.5, 14.0, 13.9. MS (MALDI-TOF): calculated for  $\text{C}_{65}\text{H}_{94}\text{O}_2\text{S}_2$  [ $\text{M}^+$ ], 970.67; found: 970.76.

**3d**: bright yellow solid (80%)  $^1\text{H}$  NMR (400 MHz,  $\text{CDCl}_3$ ,  $\delta$ ): 9.91 (s, 2H), 7.65 (s, 2H), 7.64 (s, 2H), 7.47 (s, 2H), 2.12-2.02 (m, 8H), 1.95-1.87 (m, 4H), 1.18-0.88 (m, 88H), 0.84 (t, 12H), 0.77 (t, 6H).  $^{13}\text{C}$  NMR (100 MHz,  $\text{CDCl}_3$ ,  $\delta$ ): 182.9, 155.5, 155.0, 152.3, 151.4, 144.9, 141.0, 136.1, 130.6, 115.1, 114.0, 54.8, 54.0, 40.5, 39.0, 31.9, 31.8, 30.1, 29.9, 29.7, 29.6, 29.5, 29.4, 29.3, 29.2, 29.1, 24.5, 22.6, 22.6, 14.1, 14.0. MS (MALDI-TOF): calculated for  $\text{C}_{81}\text{H}_{126}\text{O}_2\text{S}_2$  [ $\text{M}+\text{H}^+$ ], 1195.92; found: 1195.93.

**3e**: bright yellow solid (78%)  $^1\text{H}$  NMR (400 MHz,  $\text{CDCl}_3$ ,  $\delta$ ): 9.91 (s, 2H), 7.66 (s, 2H), 7.65 (s, 2H), 7.47 (s, 2H), 2.12-2.03 (m, 8H), 1.95-1.88 (m, 4H), 1.20-1.04 (m, 104H), 0.85 (t, 12H), 0.77 (t, 6H).  $^{13}\text{C}$  NMR (100 MHz,  $\text{CDCl}_3$ ,  $\delta$ ): 182.9, 155.5, 152.3, 151.4, 144.9, 141.0, 136.1, 130.6, 115.1, 114.0, 54.8, 54.0, 40.5, 39.0, 31.9, 31.8, 30.1, 29.9, 29.6, 29.4, 29.3, 29.2, 29.1, 24.5, 23.7, 22.7, 22.6, 14.1, 14.0. MS (MALDI-TOF): calculated for  $\text{C}_{89}\text{H}_{142}\text{O}_2\text{S}_2$  [ $\text{M}+\text{H}^+$ ], 1308.23; found: 1308.10.

#### *General procedure for the synthesis of compound **FCn-2Cl***

Under the atmosphere of argon, compound **3** (0.09 mmol) and **2ClIC** (0.08 g, 0.31 mmol) were dissolved in dry  $\text{CHCl}_3$  (15 mL), and then pyridine (0.20 mL) was added

to the mixture. After stirring and refluxing overnight, the mixture was cooled to room temperature and partial solvent was removed under vacuum. The residue was added into 50 mL methanol dropwise. The precipitate was collected and further purified by silica gel using  $\text{CHCl}_3$  as eluant to afford **FCn-2Cl**.

**FC4-2Cl**: dark blue solid (73%)  $^1\text{H}$  NMR (600 MHz,  $\text{CDCl}_3$ ,  $\delta$ ): 9.01 (s, 2H), 8.78 (s, 2H), 7.96 (s, 2H), 7.76 (s, 2H), 7.72 (s, 2H), 7.66 (s, 2H), 2.16-2.06 (m, 8H), 2.00-1.95 (m, 4H), 1.22-0.84 (m, 40), 0.77 (t, 18H).  $^{13}\text{C}$  NMR (150 MHz,  $\text{CDCl}_3$ ,  $\delta$ ): 186.1, 163.5, 158.6, 157.2, 156.7, 152.6, 142.9, 140.6, 139.5, 139.4, 139.3, 138.9, 138.6, 136.6, 126.9, 125.1, 120.3, 116.5, 114.7, 114.5, 68.8, 54.8, 54.2, 40.4, 39.0, 31.8, 31.7, 29.9, 29.2, 29.1, 26.7, 23.9, 22.6, 14.1, 13.9. HR-MS: calculated for  $\text{C}_{81}\text{H}_{82}\text{Cl}_4\text{N}_4\text{O}_2\text{S}_2$   $[\text{M}+\text{H}]^+$ , 1350.44710; found: 1350.4740.

**FC6-2Cl**: dark blue solid (76%)  $^1\text{H}$  NMR (600 MHz,  $\text{CDCl}_3$ ,  $\delta$ ): 9.00 (s, 2H), 8.78 (s, 2H), 7.96 (s, 2H), 7.75 (s, 2H), 7.72 (s, 2H), 7.66 (s, 2H), 2.15-2.09 (m, 8H), 2.01-1.96 (m, 4H), 1.16-0.84 (m, 56H), 0.77 (t, 18 H).  $^{13}\text{C}$  NMR (150 MHz,  $\text{CDCl}_3$ ,  $\delta$ ): 186.1, 163.6, 158.6, 157.2, 156.7, 152.2, 142.9, 140.6, 139.5, 139.4, 139.3, 138.6, 136.7, 136.1, 126.9, 125.1, 120.3, 116.5, 114.7, 114.5, 68.8, 54.8, 54.3, 40.4, 39.1, 31.8, 31.5, 29.9, 29.6, 29.2, 29.2, 24.4, 23.9, 22.6, 22.5, 14.1, 14.0. HR-MS: calculated for  $\text{C}_{89}\text{H}_{98}\text{Cl}_4\text{N}_4\text{O}_2\text{S}_2$   $[\text{M}+\text{H}]^+$ , 1461.5929; found: 1461.5988.

**FC10-2Cl**: dark blue solid (76%)  $^1\text{H}$  NMR (600 MHz,  $\text{CDCl}_3$ ,  $\delta$ ): 9.01 (s, 2H), 8.79 (s, 2H), 7.96 (s, 2H), 7.76 (s, 2H), 7.71 (s, 2H), 7.66 (s, 2H), 2.15-2.06 (m, 8H), 1.99-1.94 (m, 4H), 1.24-1.08 (m, 88H), 0.82 (t, 12H), 0.78 (t, 6H).  $^{13}\text{C}$  NMR (150 MHz,  $\text{CDCl}_3$ ,  $\delta$ ): 186.1, 163.5, 158.6, 157.2, 156.8, 152.6, 142.9, 140.6, 139.5, 139.3, 139.3, 138.6,

136.6, 136.1, 126.9, 125.1, 120.3, 116.5, 114.7, 114.5, 68.8, 54.8, 54.2, 40.4, 39.1, 31.9, 31.8, 30.0, 29.6, 29.5, 29.4, 29.3, 29.2, 22.6, 22.5, 14.1, 14.0. HR-MS: calculated for  $C_{105}H_{130}Cl_4N_4O_2S_2 [M+H]^+$ , 1686.8466; found: 1686.8459.

**FC12-2Cl**: dark blue solid (76%)  $^1H$  NMR (600 MHz,  $CDCl_3$ ,  $\delta$ ): 9.01 (s, 2H), 8.79 (s, 2H), 7.96 (s, 2H), 7.76 (s, 2H), 7.71 (s, 2H), 7.65 (s, 2H), 2.14-2.07 (m, 8H), 1.98-1.93 (m, 4H), 1.26-0.88 (m, 104), 0.84 (t, 12H), 0.78 (t, 6H).  $^{13}C$  NMR (150 MHz,  $CDCl_3$ ,  $\delta$ ): 186.1, 163.5, 158.6, 157.2, 156.8, 152.6, 142.8, 140.6, 139.5, 139.4, 139.3, 138.7, 136.6, 136.1, 126.9, 125.1, 120.3, 116.5, 114.7, 114.5, 68.8, 54.8, 54.2, 40.4, 39.1, 31.9, 31.8, 30.0, 29.6, 29.5, 29.4, 29.3, 29.2, 22.7, 22.6, 14.2, 14.1. HR-MS: calculated for  $C_{113}H_{146}Cl_4N_4O_2S_2 [M+H]^+$ , 1798.9718; found: 1798.9690.

The compounds **2c**, **3c**, and **FC8-2Cl** have been reported and characterized in previous literatures.<sup>1-3</sup>

## 2. Instruments and Measurements

The  $^1\text{H}$ ,  $^{13}\text{C}$  nuclear magnetic resonance (NMR) spectra were taken on Bruker AV400 and AV600 Spectrometers. Matrix assisted laser desorption/ionization time-of-flight (MALDI-TOF) were performed on a Bruker AutoflexIII LRF200-CID instrument and the High-Resolution Mass Spectra (HR-MS) were carried out on Bruker Solarix scimax MRMS instrument. The thermogravimetric analysis (TGA) was performed on a NETZSCH STA 409PC instrument under  $\text{N}_2$  flow. The heating rate for TGA is  $10\text{ }^\circ\text{C min}^{-1}$ . Ultraviolet-visible (UV-*vis*) absorption spectra were performed on a UV-*vis* instrument Agilent Cary 5000 UV-*vis*-NIR spectrophotometer. Cyclic voltammetry (CV) experiments of target compounds thin films were carried out to evaluate the energy levels with a LK98BII Microcomputer based Electrochemical Analyzer in acetonitrile solution at room temperature. The experiments were recorded in a conventional three-electrode configuration with a saturated calomel electrode (SCE) as the reference electrode, a glassy carbon electrode as the working electrode and a Pt wire as the counter electrode. Tetrabutylammonium phosphorous hexafluoride ( $\text{Bu}_4\text{NPF}_6$ , 0.1M) in anhydrous acetonitrile solution was used as the supporting electrolyte with the scan rate of  $100\text{ mV s}^{-1}$  under the protection of argon. Atomic force microscope (AFM) measurements were performed using Dimension Icon, Bruker in ScanAsyst mode. The transmission electron microscopy (TEM) investigation was performed on Phillips Technical G2 F20 at 200 kV. (GIWAXS) measurement was measured at Xenocs/Xeuss 2.0. All samples were deposited on the silicon and were irradiated at a fixed X-ray incident angle of  $0.2^\circ$  with an exposure

time of 1800 s. The hole and electron mobility were measured using the space charge limited current (SCLC) method, employing a diode configuration of ITO/PEDOT:PSS/active layer/MoO<sub>3</sub>/Al for hole-only devices and glass/ITO/ZnO/active layer/PDINO/Al for electron-only devices by taking the current density in the range of 0-10 V and fitting the result to space charge limited form, where SCLC is described by:

$$J = \frac{9\varepsilon_0\varepsilon_r\mu_0V^2}{8L^3}$$

where  $J$  is the current density,  $\varepsilon_0$  is the permittivity of free space ( $8.85 \times 10^{-12}$  F m<sup>-1</sup>),  $\varepsilon_r$  is the relative dielectric constant of transport medium,  $\mu$  is the hole or electron mobility,  $V$  ( $=V_{\text{appl}}-V_{\text{bi}}$ ) is the internal voltage due to the device, where  $V_{\text{appl}}$  is the applied voltage to the device and  $V_{\text{bi}}$  is the built-in voltage due to the relative work function difference of the two electrodes,  $L$  is the film thickness of the active layer.

The current density-voltage ( $J$ - $V$ ) characteristics of photovoltaic devices were obtained using a Keithley 2400 source-measure unit. The photocurrent was measured under illumination simulated 100 mW cm<sup>-2</sup> AM 1.5G irradiation using SAN-EI XES-70S1 solar simulator, calibrated with a standard Si solar cell. The EQE spectrum was measured using a QE-R Solar Cell Spectral Response Measurement System (Enli Technology Co., Ltd., Taiwan).

TPV and TPC measurements. A white light bias was generated from an array of diodes (Molex 180081-4320) with light intensity about 0.5 sun. A diode pumped laser (Lapa-80) was used as the perturbation source, with a pulse duration of 10 ns and a

repetition frequency of 20 Hz. Voltage and current dynamics were recorded on a digital oscilloscope (Tektronix MDO4104C), and voltages at open circuit and currents under short circuit conditions were measured over a 1 M $\Omega$  and a 50  $\Omega$  resistor, respectively.

### 3. Device Fabrication

The OSCs devices were fabricated using a conventional structure of ITO/PEDOT:PSS/Active layer/PDINO/Al. The indium tin oxide (ITO)-coated glass substrates were cleaned by ultrasonic treatment in detergent, deionized water, acetone, and isopropyl alcohol under ultrasonication for 15 min each and subsequently dried by an argon blow. Subsequently, a thin layer of PEDOT:PSS was spin-coated on top of precleaned ITO substrates at 4300 rpm for 20 s and annealed in air at 150 °C in air for 15 min. Then the **BSFTR:FCn-2Cl** (1:0.8, w/w, D: 8 mg/mL, no additives) in chloroform (CF) was spin coated at 1700 rpm to form an active layer with a thickness of 110 nm. Then the substrates were TA treatment with 120 °C for 10 min. After that, about 15 nm PDINO layer was spin coated on the top of the active layer at 3000 rpm. Finally, a layer of Al with thickness of 90 nm was thermally evaporated under a shadow mask with a base pressure of ca. 10<sup>-5</sup> Pa. The active area of the device was 4 mm<sup>2</sup>.

#### 4. Figures and Tables

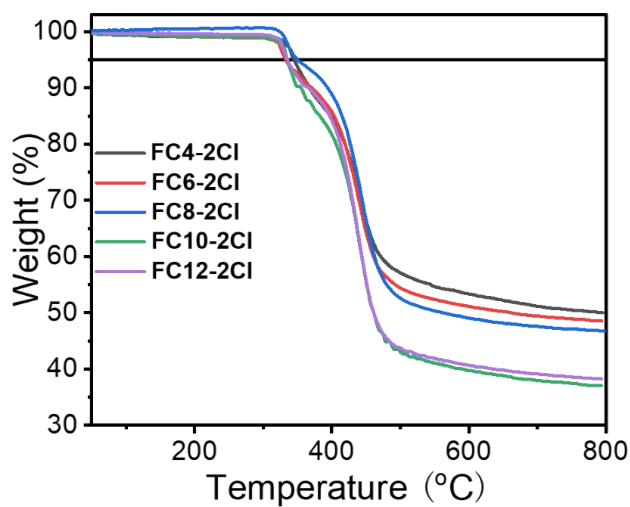

**Fig. S1** The thermogravimetric analysis (TGA) plots of **FCn-2Cl**.

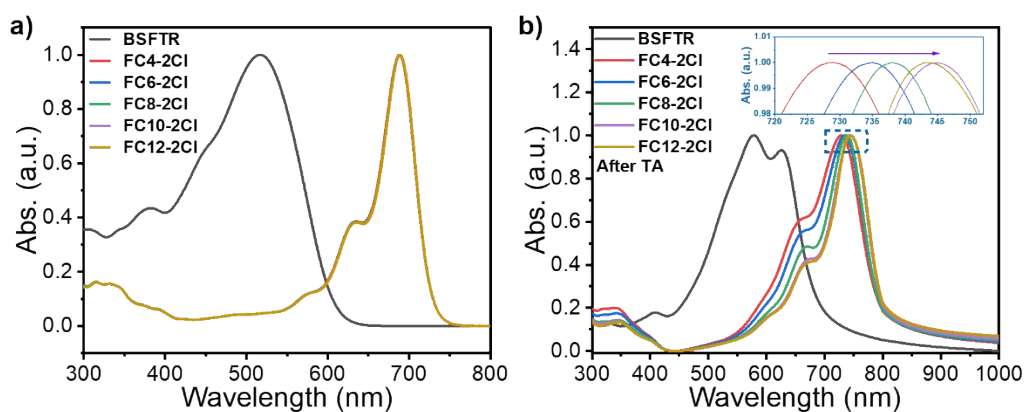

**Fig. S2** Normalized UV-vis absorption spectra of BSFTR and **FCn-2Cl** in a) solution and b) thin films after TA 120 °C for 10 min.

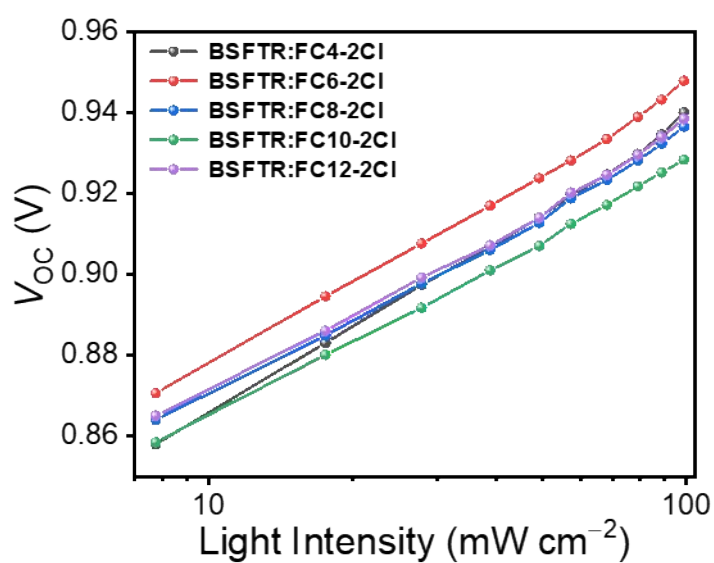

**Fig. S3** Light intensity ( $P_{\text{light}}$ ) dependence of  $V_{\text{OC}}$  of BSFTR:FCn-2Cl-based ASM-OSCs.

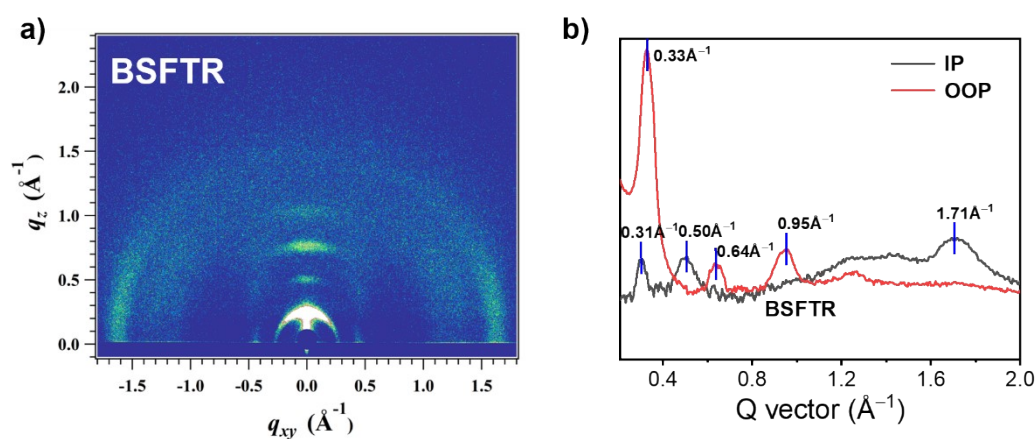

**Fig. S4** a) 2D-GIWAXS pattern and b) line-cut profiles for the neat film of BSFTR.

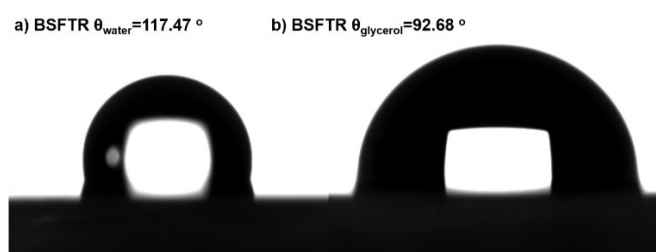

**Fig. S5** a) contact angle of water and b) contact angle of glycerol on BSFTR.

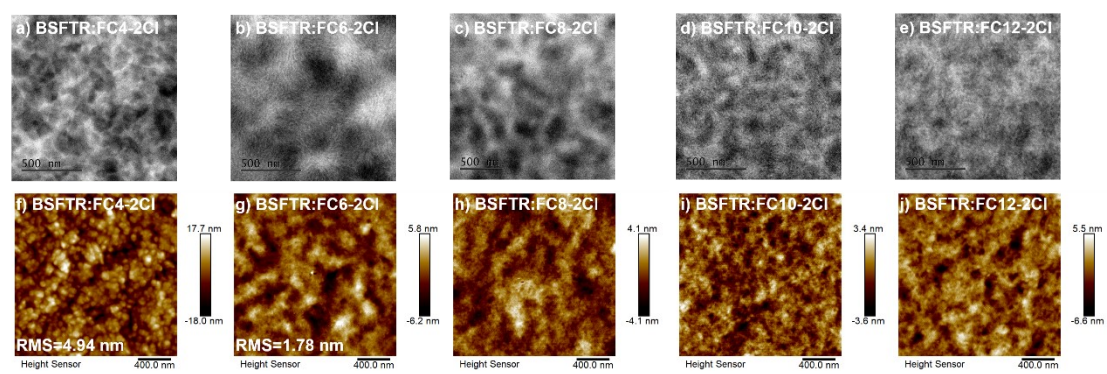

**Fig. S6** a-e) TEM images and f-j) AFM images for the blend films based on BSFTR:FCn-2Cl (n=4, 6, 8, 10, 12).

**Table S1.** The recent work of vapor-deposition ASM-OSCs.

| Active layer                            | $V_{OC}$ (V) | $J_{SC}$ (mA cm <sup>-2</sup> ) | FF (%) | PCE (%) | Ref. |
|-----------------------------------------|--------------|---------------------------------|--------|---------|------|
| CuPc/PV                                 | 0.450        | 2.30                            | 0.650  | 0.95    | 4    |
| SubPc/F <sub>13</sub> SubPc             | 0.940        | 2.10                            | 0.490  | 0.96    | 5    |
| SubNc/F <sub>13</sub> SubPc             | 0.700        | 2.40                            | 0.370  | 0.63    |      |
| AlPcCl/F <sub>13</sub> SubPc            | 0.660        | 0.53                            | 0.350  | 0.12    |      |
| CuPc/F <sub>13</sub> SubPc              | 0.270        | 0.27                            | 0.240  | 0.02    |      |
| 5cene/F <sub>13</sub> SubPc             | 0.090        | 1.20                            | 0.330  | 0.03    |      |
| SubPc/F <sub>12</sub> SubPc             | 0.710        | 2.20                            | 0.340  | 0.52    |      |
| AlPcCl/F <sub>12</sub> SubPc            | 0.600        | 0.99                            | 0.320  | 0.19    |      |
| CuPc/F <sub>12</sub> SubPc              | 0.160        | 0.53                            | 0.290  | 0.02    |      |
| SubPc/C <sub>60</sub>                   | 0.920        | 5.40                            | 0.610  | 3.00    |      |
| SubNc/C <sub>60</sub>                   | 0.790        | 6.50                            | 0.490  | 2.50    |      |
| AlPcCl/C <sub>60</sub>                  | 0.640        | 3.30                            | 0.480  | 1.00    |      |
| CuPc/C <sub>60</sub>                    | 0.440        | 3.70                            | 0.610  | 1.00    |      |
| 5cene/C <sub>60</sub>                   | 0.350        | 3.10                            | 0.530  | 0.58    |      |
| SubPc/C <sub>60</sub>                   | 1.090        | 4.90                            | 0.610  | 3.30    | 6    |
| SubPc/FSubPcDimer                       | 0.960        | 5.10                            | 0.240  | 1.20    |      |
| FSubPcDimer/SubPc                       | 0.890        | 5.80                            | 0.480  | 2.50    |      |
| SubPc/FSubPcDimer/C <sub>60</sub>       | 0.950        | 7.80                            | 0.540  | 4.00    |      |
| SubPc/C <sub>60</sub>                   | 1.100        | 5.03                            | 0.530  | 2.97    | 7    |
| SubPc/F <sub>3</sub> -SubPc             | 1.100        | 0.83                            | 0.220  | 0.19    |      |
| SubPc/F <sub>6</sub> -SubPc             | 1.220        | 1.56                            | 0.430  | 0.80    |      |
| SubPc/Cl <sub>6</sub> -SubPc            | 1.310        | 3.53                            | 0.580  | 2.68    |      |
| ZnPc/C <sub>60</sub>                    | 0.460        | 14.10                           | 0.549  | 3.51    | 8    |
| $\alpha$ -6T/C <sub>60</sub>            | 0.420        | 4.56                            | 0.546  | 1.03    | 9    |
| $\alpha$ -6T/SubPc                      | 1.090        | 7.46                            | 0.579  | 4.69    |      |
| $\alpha$ -6T/SubNc                      | 0.940        | 12.04                           | 0.539  | 6.02    |      |
| $\alpha$ -6T/SubNc/SubPc                | 0.960        | 14.55                           | 0.610  | 8.40    |      |
| DPPT:C <sub>60</sub>                    | 0.950        | 5.55                            | 0.290  | 1.55    | 10   |
| DPPT/DPPT:C <sub>60</sub>               | 0.960        | 5.78                            | 0.380  | 2.11    |      |
| DPPT/DPPT:C <sub>70</sub>               | 0.960        | 8.09                            | 0.340  | 2.63    |      |
| DTPT/DTPT:C <sub>70</sub>               | 0.850        | 6.40                            | 0.340  | 1.86    |      |
| 1-NPPT/1-NPPT:C <sub>70</sub>           | 0.970        | 3.55                            | 0.260  | 0.90    |      |
| DPPT:C <sub>70</sub> /C <sub>70</sub>   | 0.980        | 9.05                            | 0.400  | 3.52    |      |
| DTPT:C <sub>70</sub> /C <sub>70</sub>   | 0.760        | 6.27                            | 0.360  | 1.72    |      |
| 1-NPPT:C <sub>70</sub> /C <sub>70</sub> | 0.870        | 5.64                            | 0.300  | 1.48    |      |
| BBTBDTM/C <sub>60</sub> (PHJ)           | 0.910        | 1.23                            | 0.350  | 0.39    | 11   |
| BBTBDTM/C <sub>60</sub> (PMHJ)          | 0.700        | 4.56                            | 0.470  | 1.49    |      |

**Table S2.** The recent work of solution-processed ASM-OSCs.

| Active layer                      | $V_{OC}$ (V) | $J_{SC}$ (mA cm <sup>-2</sup> ) | FF (%) | PCE (%) | Ref. |
|-----------------------------------|--------------|---------------------------------|--------|---------|------|
| DCAE7T:PC <sub>61</sub> BM        | 0.880        | 9.94                            | 0.510  | 4.46    | 12   |
| DCAEH7T:PC <sub>61</sub> BM       | 0.930        | 9.91                            | 0.491  | 4.52    |      |
| DCAO7T:PC <sub>61</sub> BM        | 0.860        | 10.74                           | 0.550  | 5.08    |      |
| DRCN4T:PC <sub>71</sub> BM        | 0.900        | 0.70                            | 0.380  | 0.24    | 13   |
| DRCN5T:PC <sub>71</sub> BM        | 0.920        | 15.66                           | 0.680  | 10.08   |      |
| DRCN6T:PC <sub>71</sub> BM        | 0.920        | 11.45                           | 0.580  | 6.33    |      |
| DRCN7T:PC <sub>71</sub> BM        | 0.900        | 14.77                           | 0.680  | 9.30    |      |
| DRCN8T:PC <sub>71</sub> BM        | 0.860        | 10.80                           | 0.680  | 6.50    |      |
| DRCN9T:PC <sub>71</sub> BM        | 0.810        | 13.77                           | 0.680  | 7.86    |      |
| DCAO3T(BDT)3T:PC <sub>61</sub> BM | 0.930        | 9.77                            | 0.599  | 5.44    | 14   |
| BTR:PC <sub>71</sub> BM           | 0.900        | 13.90                           | 0.740  | 9.30    | 15   |
| BTR:Y6                            | 0.850        | 22.25                           | 0.564  | 10.67   | 16   |
| BTR-Cl:Y6                         | 0.860        | 24.17                           | 0.655  | 13.61   |      |
| B1:BO-4Cl                         | 0.830        | 25.27                           | 0.730  | 15.30   | 17   |
| ZR1:Y6                            | 0.861        | 24.34                           | 0.684  | 14.34   | 18   |
| ZR1:IDIC-4Cl                      | 0.776        | 18.27                           | 0.680  | 9.64    |      |
| BSFTR:Y6                          | 0.850        | 23.16                           | 0.697  | 13.69   | 19   |
| BSFTR:FO-2Cl                      | 0.885        | 22.01                           | 0.784  | 15.27   | 20   |
| BSFTR:FO-EH-2Cl                   | 0.876        | 22.39                           | 0.804  | 15.78   |      |
| C8-C-F:F-2Cl                      | 0.936        | 17.71                           | 0.733  | 12.15   | 21   |
| C8-C-F:FO-2Cl                     | 0.906        | 20.08                           | 0.765  | 13.91   |      |
| M-PhS:BTP-eC9                     | 0.840        | 25.40                           | 0.756  | 16.20   | 22   |
| P-PhS:BTP-eC9                     | 0.880        | 21.60                           | 0.626  | 11.90   |      |
| B1:BO-4Cl:Y7                      | 0.836        | 25.52                           | 0.763  | 16.28   | 23   |
| B1:BO-2Cl:BO-4Cl                  | 0.840        | 25.31                           | 0.780  | 17.00   | 24   |

**Table S3.** Summary of the GIWAXS parameters for the neat films of FCn-2Cl (n=4, 6, 8, 10, 12).

| Acceptor | $q_z$ (010) (Å <sup>-1</sup> ) <sup>a</sup> | FWHM (Å <sup>-1</sup> ) <sup>b</sup> | $d_{010}$ (Å) | CCL (Å) <sup>c</sup> |
|----------|---------------------------------------------|--------------------------------------|---------------|----------------------|
| FC4-2Cl  | 1.77                                        | 0.397                                | 3.55          | 14.24                |
| FC6-2Cl  | 1.80                                        | 0.230                                | 3.49          | 24.59                |
| FC8-2Cl  | 1.81                                        | 0.184                                | 3.47          | 30.73                |
| FC10-2Cl | 1.82                                        | 0.183                                | 3.45          | 30.90                |
| FC12-2Cl | 1.83                                        | 0.160                                | 3.43          | 35.34                |

<sup>a</sup>The (010) diffraction peak in the OOP direction; <sup>b</sup>Full-width at half-maximum by Gaussian fitting; <sup>c</sup>CCL estimated from Scherrer's equation ( $CCL=2\pi k/FWHM$ ).

**Table S4.** Photovoltaic performance of the solar cells based on BSFTR:FC4-2Cl blend films with different D:A ration under illumination of AM 1.5 G, 100 mW cm<sup>-2</sup>.

| D:A   | $V_{OC}$ (V) | $J_{SC}$ (mA cm <sup>-2</sup> ) | FF (%) | PCE (%) |
|-------|--------------|---------------------------------|--------|---------|
| 1:0.6 | 0.935        | 11.42                           | 0.651  | 6.95    |
| 1:0.8 | 0.932        | 11.60                           | 0.684  | 7.39    |
| 1:1   | 0.928        | 11.22                           | 0.681  | 7.09    |

**Table S5.** Photovoltaic performance of the solar cells based on BSFTR:FC4-2Cl (1:0.8, w/w) blend films with different DIO contents under illumination of AM 1.5 G, 100 mW cm<sup>-2</sup>.

| V%   | $V_{OC}$ (V) | $J_{SC}$ (mA cm <sup>-2</sup> ) | FF (%) | PCE (%) |
|------|--------------|---------------------------------|--------|---------|
| none | 0.939        | 11.34                           | 0.696  | 7.41    |
| 0.3  | 0.937        | 10.67                           | 0.691  | 6.90    |
| 0.5  | 0.910        | 7.89                            | 0.651  | 4.67    |
| 0.7  | 0.900        | 7.51                            | 0.637  | 4.31    |

**Table S6.** Photovoltaic performance of the solar cells based on BSFTR:FC4-2Cl (1:0.8, w/w) blend films with different TA temperatures under illumination of AM 1.5 G, 100 mW cm<sup>-2</sup>.

| TA (°C) | $V_{OC}$ (V) | $J_{SC}$ (mA cm <sup>-2</sup> ) | FF (%) | PCE (%) |
|---------|--------------|---------------------------------|--------|---------|
| 0       | 0.957        | 7.22                            | 0.541  | 3.74    |
| 110     | 0.951        | 10.82                           | 0.696  | 7.16    |
| 120     | 0.948        | 11.56                           | 0.696  | 7.48    |
| 130     | 0.930        | 11.94                           | 0.653  | 7.24    |

**Table S7.** Photovoltaic performance of the solar cells based on BSFTR:FC6-2Cl blend films with different D:A ration under illumination of AM 1.5 G, 100 mW cm<sup>-2</sup>.

| D:A   | $V_{OC}$ (V) | $J_{SC}$ (mA cm <sup>-2</sup> ) | FF (%) | PCE (%) |
|-------|--------------|---------------------------------|--------|---------|
| 1:0.6 | 0.938        | 13.10                           | 0.677  | 8.32    |
| 1:0.8 | 0.935        | 13.29                           | 0.692  | 8.61    |
| 1:1   | 0.929        | 13.60                           | 0.675  | 8.43    |

**Table S8.** Photovoltaic performance of the solar cells based on BSFTR:FC6-2Cl (1:0.8, w/w) blend films with different DIO contents under illumination of AM 1.5 G, 100 mW cm<sup>-2</sup>.

| V%   | $V_{OC}$ (V) | $J_{SC}$ (mA cm <sup>-2</sup> ) | FF (%) | PCE (%) |
|------|--------------|---------------------------------|--------|---------|
| none | 0.945        | 13.96                           | 0.693  | 9.14    |
| 0.3  | 0.881        | 13.86                           | 0.740  | 9.04    |
| 0.5  | 0.880        | 11.97                           | 0.687  | 7.24    |
| 0.7  | 0.879        | 9.43                            | 0.643  | 5.33    |

**Table S9.** Photovoltaic performance of the solar cells based on BSFTR:FC6-2Cl (1:0.8, w/w) blend films with different TA temperatures under illumination of AM 1.5 G, 100 mW cm<sup>-2</sup>.

| TA (°C) | $V_{OC}$ (V) | $J_{SC}$ (mA cm <sup>-2</sup> ) | FF (%) | PCE (%) |
|---------|--------------|---------------------------------|--------|---------|
| 0       | 0.961        | 5.04                            | 0.315  | 1.52    |
| 110     | 0.957        | 13.92                           | 0.621  | 8.24    |
| 120     | 0.949        | 14.77                           | 0.703  | 9.85    |
| 130     | 0.922        | 13.70                           | 0.651  | 8.23    |

**Table S10.** Photovoltaic performance of the solar cells based on BSFTR:FC8-2Cl blend films with different D:A ration under illumination of AM 1.5 G, 100 mW cm<sup>-2</sup>.

| D:A   | $V_{OC}$ (V) | $J_{SC}$ (mA cm <sup>-2</sup> ) | FF (%) | PCE (%) |
|-------|--------------|---------------------------------|--------|---------|
| 1:0.6 | 0.931        | 15.95                           | 0.672  | 9.97    |
| 1:0.8 | 0.934        | 16.69                           | 0.717  | 11.27   |
| 1:1   | 0.925        | 17.05                           | 0.676  | 10.78   |

**Table S11.** Photovoltaic performance of the solar cells based on BSFTR:FC8-2Cl (1:0.8, w/w) blend films with different DIO contents under illumination of AM 1.5 G, 100 mW cm<sup>-2</sup>.

| V%   | $V_{OC}$ (V) | $J_{SC}$ (mA cm <sup>-2</sup> ) | FF (%) | PCE (%) |
|------|--------------|---------------------------------|--------|---------|
| none | 0.942        | 18.08                           | 0.693  | 11.81   |
| 0.3  | 0.932        | 16.40                           | 0.731  | 11.18   |
| 0.5  | 0.918        | 9.09                            | 0.617  | 5.15    |
| 0.7  | 0.909        | 9.75                            | 0.530  | 4.70    |

**Table S12.** Photovoltaic performance of the solar cells based on BSFTR:FC8-2Cl (1:0.8, w/w) blend films with different TA temperatures under illumination of AM 1.5 G, 100 mW cm<sup>-2</sup>.

| TA (°C) | $V_{OC}$ (V) | $J_{SC}$ (mA cm <sup>-2</sup> ) | FF (%) | PCE (%) |
|---------|--------------|---------------------------------|--------|---------|
| 0       | 0.954        | 5.16                            | 0.317  | 1.56    |
| 110     | 0.946        | 17.13                           | 0.664  | 10.73   |
| 120     | 0.942        | 18.05                           | 0.729  | 11.99   |
| 130     | 0.938        | 18.11                           | 0.686  | 11.66   |

**Table S13.** Photovoltaic performance of the solar cells based on BSFTR:FC10-2Cl blend films with different D:A ration under illumination of AM 1.5 G, 100 mW cm<sup>-2</sup>.

| D:A   | $V_{OC}$ (V) | $J_{SC}$ (mA cm <sup>-2</sup> ) | FF (%) | PCE (%) |
|-------|--------------|---------------------------------|--------|---------|
| 1:0.6 | 0.932        | 17.10                           | 0.696  | 11.05   |
| 1:0.8 | 0.933        | 17.34                           | 0.723  | 11.71   |
| 1:1   | 0.918        | 17.10                           | 0.696  | 10.93   |

**Table S14.** Photovoltaic performance of the solar cells based on BSFTR:FC10-2Cl (1:0.8, w/w) blend films with different DIO contents under illumination of AM 1.5 G, 100 mW cm<sup>-2</sup>.

| V%   | $V_{OC}$ (V) | $J_{SC}$ (mA cm <sup>-2</sup> ) | FF (%) | PCE (%) |
|------|--------------|---------------------------------|--------|---------|
| none | 0.935        | 17.82                           | 0.728  | 12.12   |
| 0.3  | 0.932        | 16.84                           | 0.745  | 11.69   |
| 0.5  | 0.951        | 12.16                           | 0.664  | 7.69    |
| 0.7  | 0.946        | 10.34                           | 0.561  | 5.48    |

**Table S15.** Photovoltaic performance of the solar cells based on BSFTR:FC10-2Cl (1:0.8, w/w) blend films with different TA temperatures under illumination of AM 1.5 G, 100 mW cm<sup>-2</sup>.

| TA (°C) | $V_{OC}$ (V) | $J_{SC}$ (mA cm <sup>-2</sup> ) | FF (%) | PCE (%) |
|---------|--------------|---------------------------------|--------|---------|
| 0       | 0.953        | 5.54                            | 0.323  | 1.71    |
| 110     | 0.944        | 17.28                           | 0.659  | 10.75   |
| 120     | 0.938        | 18.53                           | 0.738  | 12.54   |
| 130     | 0.928        | 18.00                           | 0.690  | 11.53   |

**Table S16.** Photovoltaic performance of the solar cells based on BSFTR:FC12-2Cl blend films with different D:A ration under illumination of AM 1.5 G, 100 mW cm<sup>-2</sup>.

| D:A   | $V_{OC}$ (V) | $J_{SC}$ (mA cm <sup>-2</sup> ) | FF (%) | PCE (%) |
|-------|--------------|---------------------------------|--------|---------|
| 1:0.6 | 0.933        | 15.06                           | 0.712  | 10.01   |
| 1:0.8 | 0.935        | 16.44                           | 0.730  | 11.18   |
| 1:1   | 0.925        | 16.46                           | 0.684  | 10.38   |

**Table S17.** Photovoltaic performance of the solar cells based on BSFTR:FC12-2Cl (1:0.8, w/w) blend films with different DIO contents under illumination of AM 1.5 G, 100 mW cm<sup>-2</sup>.

| V%   | $V_{OC}$ (V) | $J_{SC}$ (mA cm <sup>-2</sup> ) | FF (%) | PCE (%) |
|------|--------------|---------------------------------|--------|---------|
| none | 0.941        | 16.62                           | 0.745  | 11.37   |
| 0.3  | 0.942        | 14.15                           | 0.701  | 9.34    |
| 0.5  | 0.953        | 10.82                           | 0.637  | 6.57    |
| 0.7  | 0.946        | 10.34                           | 0.561  | 5.48    |

**Table S18.** Photovoltaic performance of the solar cells based on BSFTR:FC12-2Cl (1:0.8, w/w) blend films with different TA temperatures under illumination of AM 1.5 G, 100 mW cm<sup>-2</sup>.

| TA (°C) | $V_{OC}$ (V) | $J_{SC}$ (mA cm <sup>-2</sup> ) | FF (%) | PCE (%) |
|---------|--------------|---------------------------------|--------|---------|
| 0       | 0.986        | 9.33                            | 0.503  | 4.63    |
| 110     | 0.944        | 16.16                           | 0.732  | 10.88   |
| 120     | 0.944        | 16.83                           | 0.750  | 11.47   |
| 130     | 0.924        | 16.49                           | 0.698  | 10.64   |

**Table S19.** The detailed data of physical dynamic characterizations for **BSFTR:FCn-2Cl**-based devices.

| Acceptors | $P_{\text{diss}}$ | $P_{\text{coll}}$ | $\alpha$ | n    | TPV<br>(ms) | TPC<br>( $\mu\text{s}$ ) | $\frac{\mu_{\text{h}}}{\mu_{\text{e}}}$<br>( $10^{-4} \text{ cm}^2 \text{ V}^{-1} \text{ s}^{-1}$ ) | $\mu_{\text{h}}/\mu_{\text{e}}$ |      |
|-----------|-------------------|-------------------|----------|------|-------------|--------------------------|-----------------------------------------------------------------------------------------------------|---------------------------------|------|
| FC4-2Cl   | 88%               | 71%               | 0.98     | 1.34 | 19.1        | 0.359                    | 1.35                                                                                                | 1.08                            | 1.25 |
| FC6-2Cl   | 92%               | 74%               | 0.98     | 1.26 | 21.1        | 0.332                    | 1.48                                                                                                | 1.26                            | 1.17 |
| FC8-2Cl   | 96%               | 83%               | 0.99     | 1.20 | 29.0        | 0.318                    | 1.75                                                                                                | 1.60                            | 1.09 |
| FC10-2Cl  | 96%               | 84%               | 0.99     | 1.17 | 30.4        | 0.277                    | 1.79                                                                                                | 1.70                            | 1.05 |
| FC12-2Cl  | 94%               | 82%               | 0.99     | 1.21 | 24.6        | 0.324                    | 1.52                                                                                                | 1.36                            | 1.12 |

**Table S20.** The  $\chi$  values calculated from surface tensions.

| Neat films | $\theta_{\text{water}}$ [°] | $\theta_{\text{glycerol}}$ [°] | $\gamma$ [mN m <sup>-1</sup> ] | $\chi$ |
|------------|-----------------------------|--------------------------------|--------------------------------|--------|
| BSFTR      | 117.47                      | 92.68                          | -                              | -      |
| FC4-2Cl    | 105.93                      | 77.20                          | 46.60                          | 2.63   |
| FC6-2Cl    | 109.46                      | 79.73                          | 39.23                          | 1.12   |
| FC8-2Cl    | 110.78                      | 80.41                          | 38.43                          | 0.99   |
| FC10-2Cl   | 114.87                      | 82.53                          | 35.69                          | 0.59   |
| FC12-2Cl   | 118.77                      | 80.71                          | 35.14                          | 0.52   |

Chemical structure of compound 10 is shown above the spectrum. The structure is a symmetrical molecule with a central biphenyl core. The left phenyl ring is substituted with a cyano group (CN), a carbonyl group (C=O), and two chlorine atoms (Cl). The right phenyl ring is also substituted with a cyano group (CN), a carbonyl group (C=O), and two chlorine atoms (Cl). The central biphenyl core is substituted with two phenyl rings, each of which is further substituted with a cyano group (CN), a carbonyl group (C=O), and two chlorine atoms (Cl). The chemical structure is labeled with C<sub>4</sub>H<sub>9</sub>, C<sub>6</sub>H<sub>17</sub>, and C<sub>8</sub>H<sub>17</sub> groups.

<sup>1</sup>H NMR spectrum (CDCl<sub>3</sub>) of compound 10. The x-axis represents the chemical shift in ppm, ranging from 0.0 to 9.0. The spectrum shows several peaks, with integration values provided below the peaks: 2.00, 2.05, 2.10, 1.99, 2.22, 2.14, 8.20, 4.03, 40.45, and 18.19. The peaks are labeled with their corresponding chemical shifts: 9.01, 8.78, 7.96, 7.76, 7.72, 7.66, 7.26, 2.16, 2.15, 2.14, 2.13, 2.12, 2.11, 2.08, 2.06, 2.00, 2.00, 1.98, 1.97, 1.96, 1.95, 1.92, 1.21, 1.20, 1.19, 1.17, 1.17, 1.15, 1.14, 1.12, 1.11, 1.10, 1.09, 1.08, 0.95, 0.94, 0.93, 0.92, 0.91, 0.90, 0.89, 0.88, 0.87, 0.86, 0.85, 0.84, 0.78, 0.77, and 0.76.

Chemical structure of compound 10 is shown above the spectrum. The structure is a complex polycyclic molecule featuring a central benzene ring substituted with two thiophene rings, which are further substituted with phenyl groups and cyano groups. The structure is labeled with various carbon counts: C<sub>4</sub>H<sub>9</sub>, C<sub>8</sub>H<sub>17</sub>, and C<sub>8</sub>H<sub>17</sub>.

<sup>13</sup>C NMR spectrum (ppm):

- 186.1
- 163.5
- 158.6
- 157.2
- 156.7
- 152.6
- 142.9
- 140.6
- 139.5
- 139.4
- 139.3
- 138.9
- 138.6
- 136.6
- 136.1
- 128.9
- 125.1
- 120.3
- 116.5
- 114.7
- 114.5
- 68.8
- 54.8
- 54.2
- 40.4
- 39.0
- 31.8
- 31.7
- 29.9
- 29.2
- 29.1
- 26.7
- 23.9
- 23.0
- 22.6
- 14.1
- 13.9

**Fig. S8**  $^{13}\text{C}$  NMR spectrum of **FC4-2Cl** in  $\text{CDCl}_3$ .

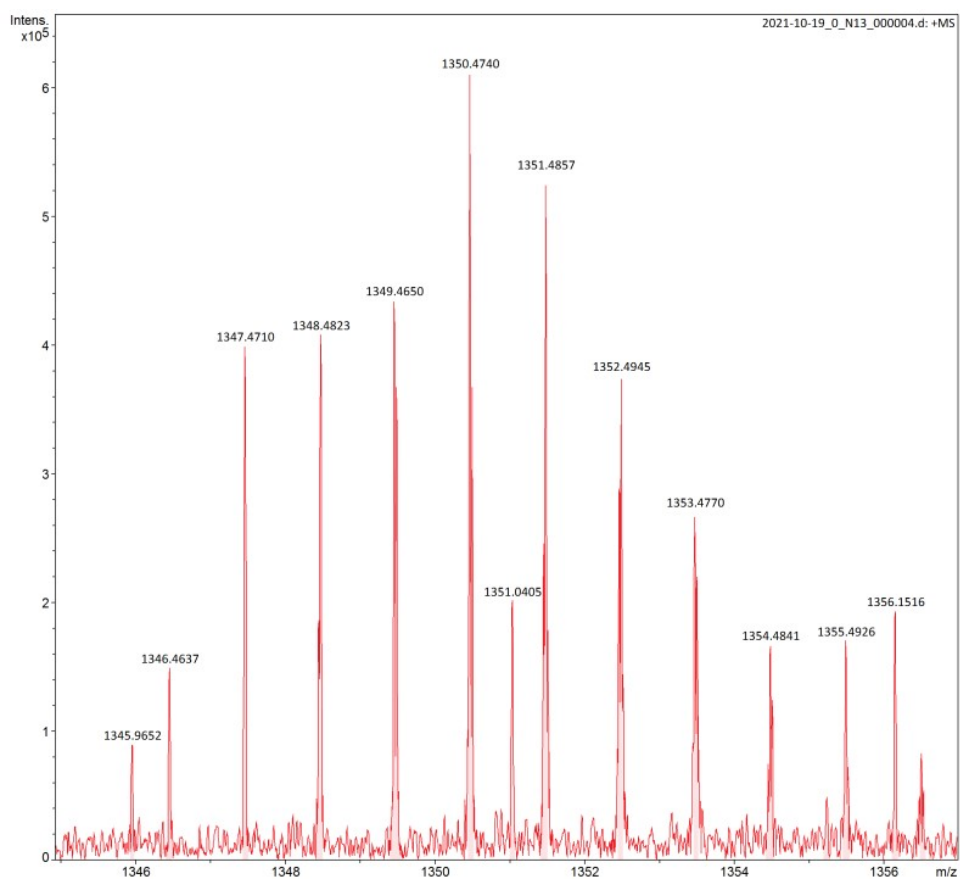

**Fig. S9** HR-MS spectrum of FC4-2Cl.

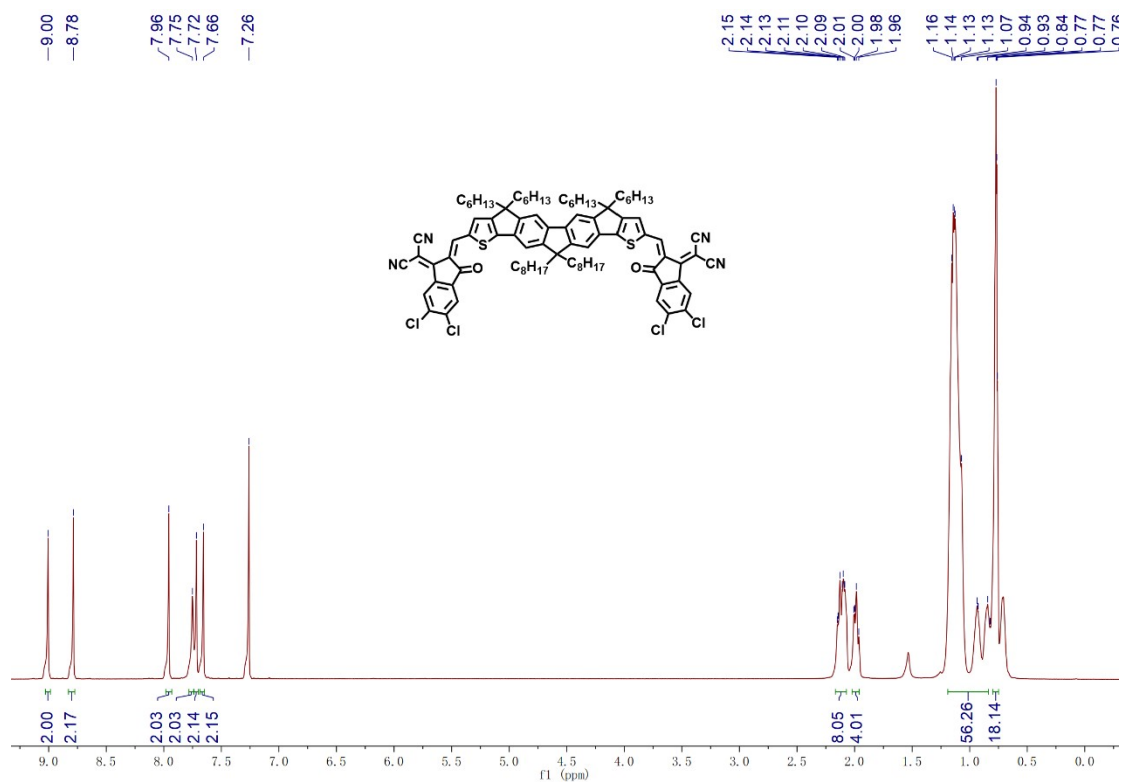

**Fig. S10** <sup>1</sup>H NMR spectrum of FC6-2Cl in CDCl<sub>3</sub>.

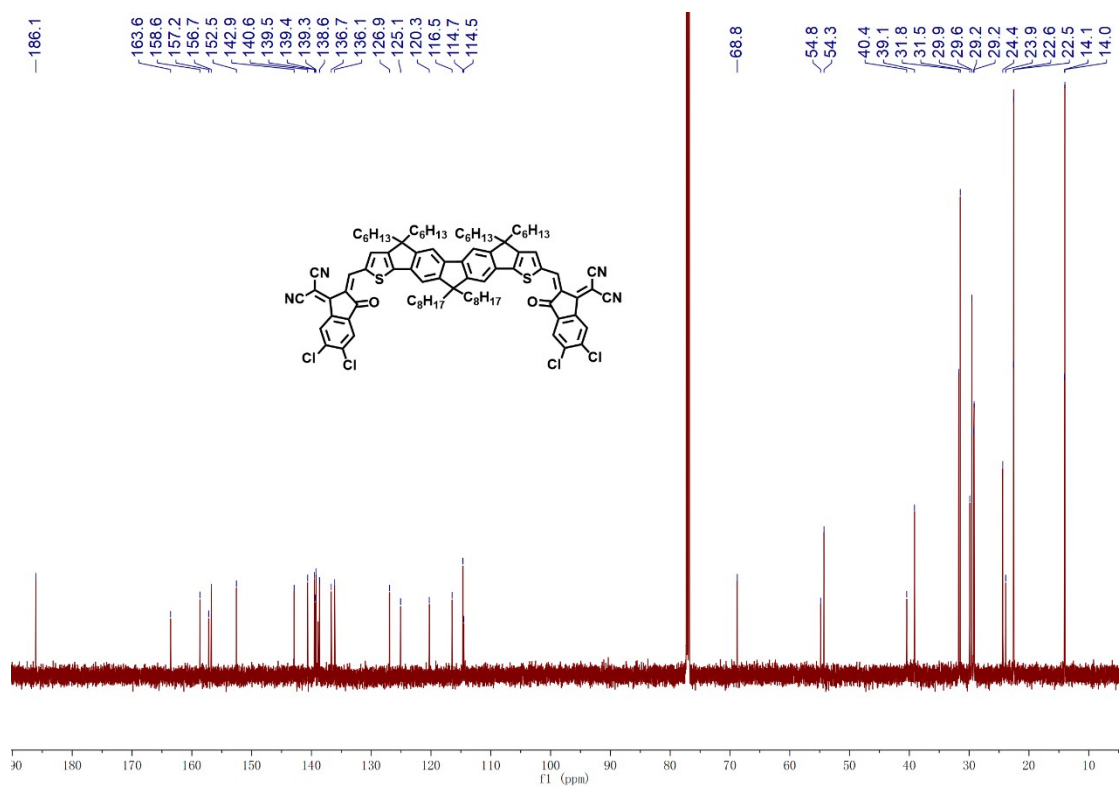

**Fig. S11** <sup>13</sup>C NMR spectrum of FC6-2Cl in CDCl<sub>3</sub>.

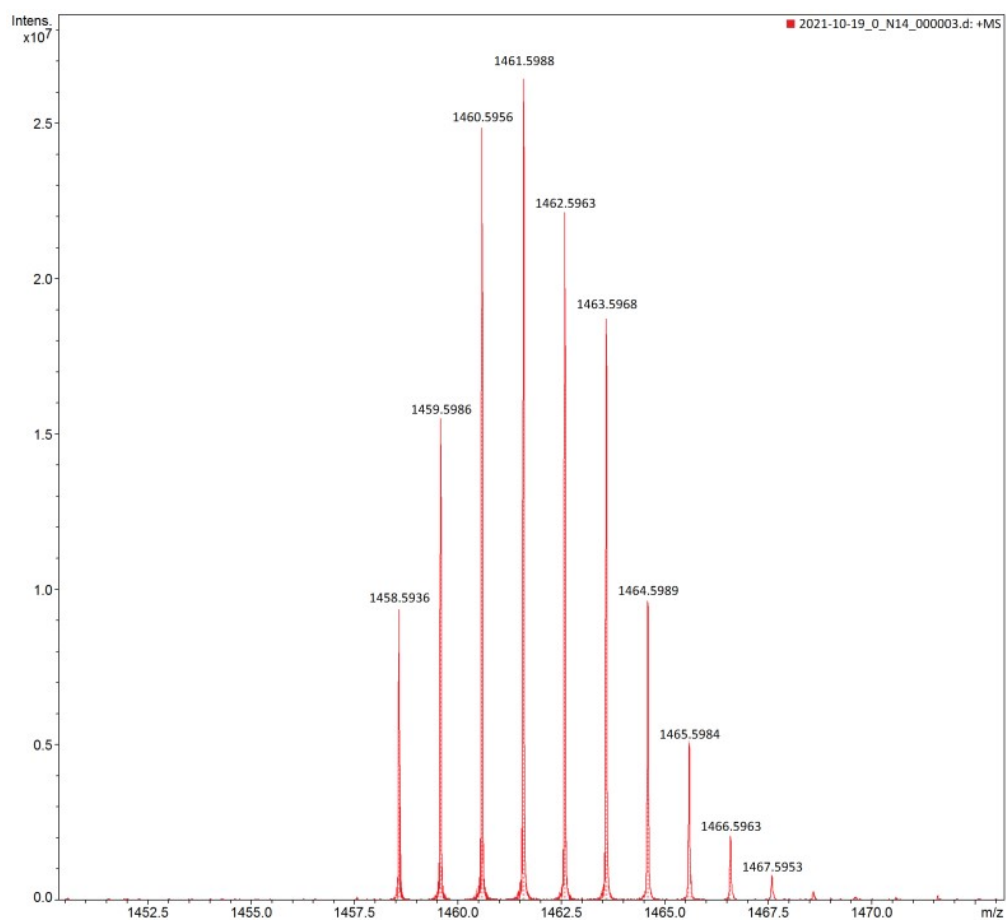

**Fig. S12** HR-MS spectrum of FC6-2Cl.

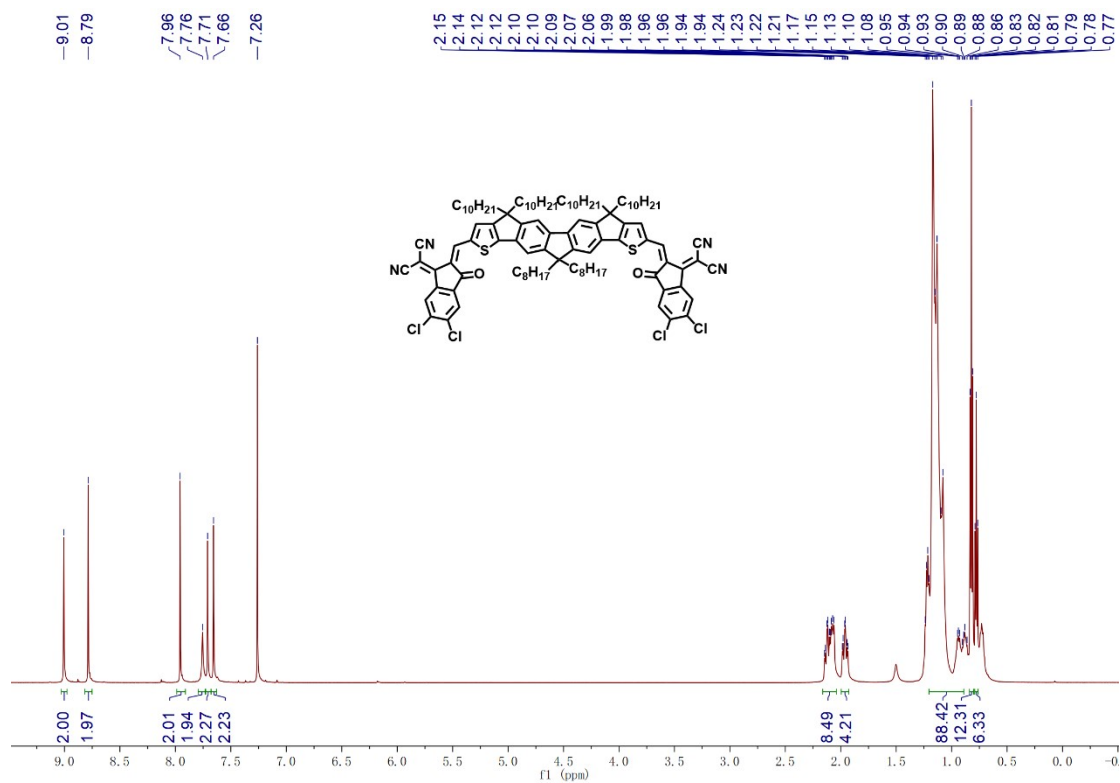

**Fig. S13** <sup>1</sup>H NMR spectrum of FC10-2Cl in CDCl<sub>3</sub>.

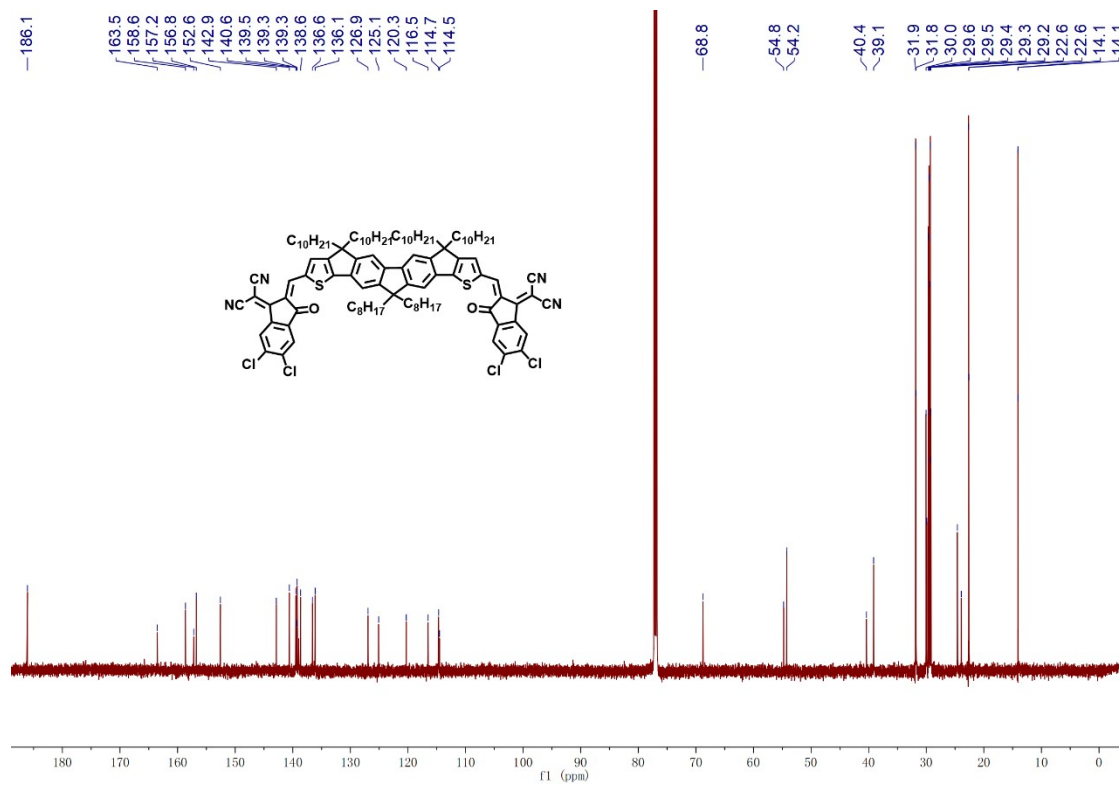

**Fig. S14** <sup>13</sup>C NMR spectrum of FC10-2Cl in CDCl<sub>3</sub>.

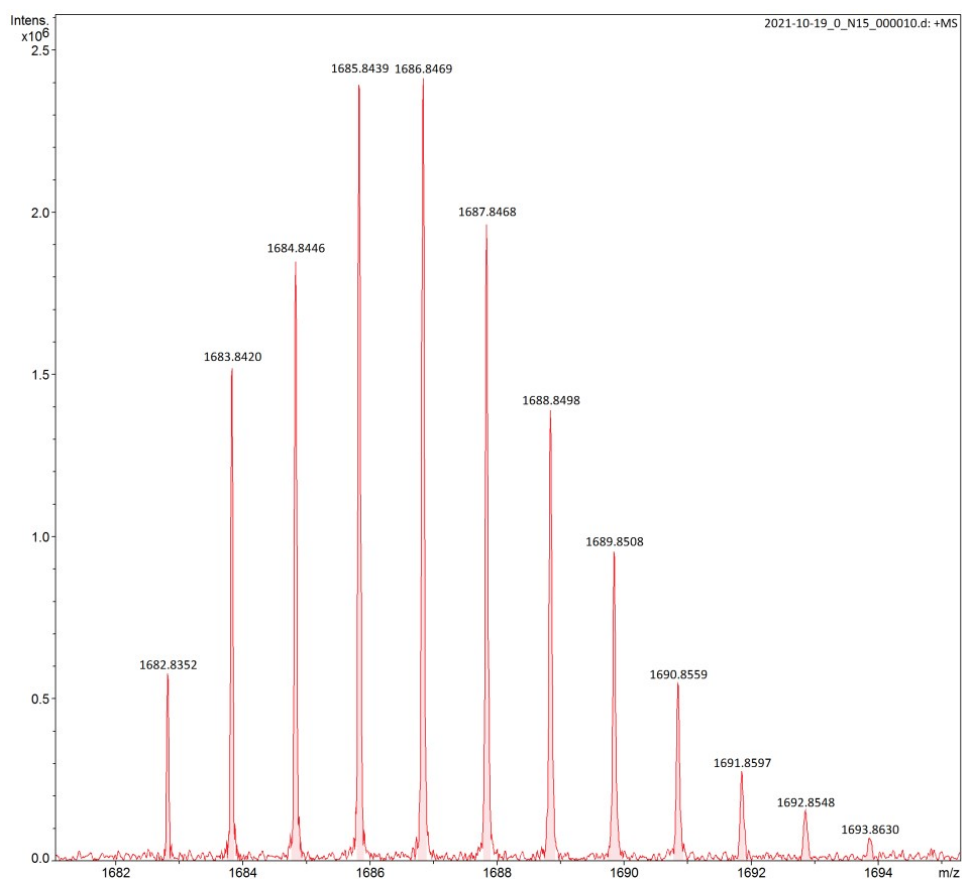

**Fig. S15** HR-MS spectrum of FC10-2Cl.

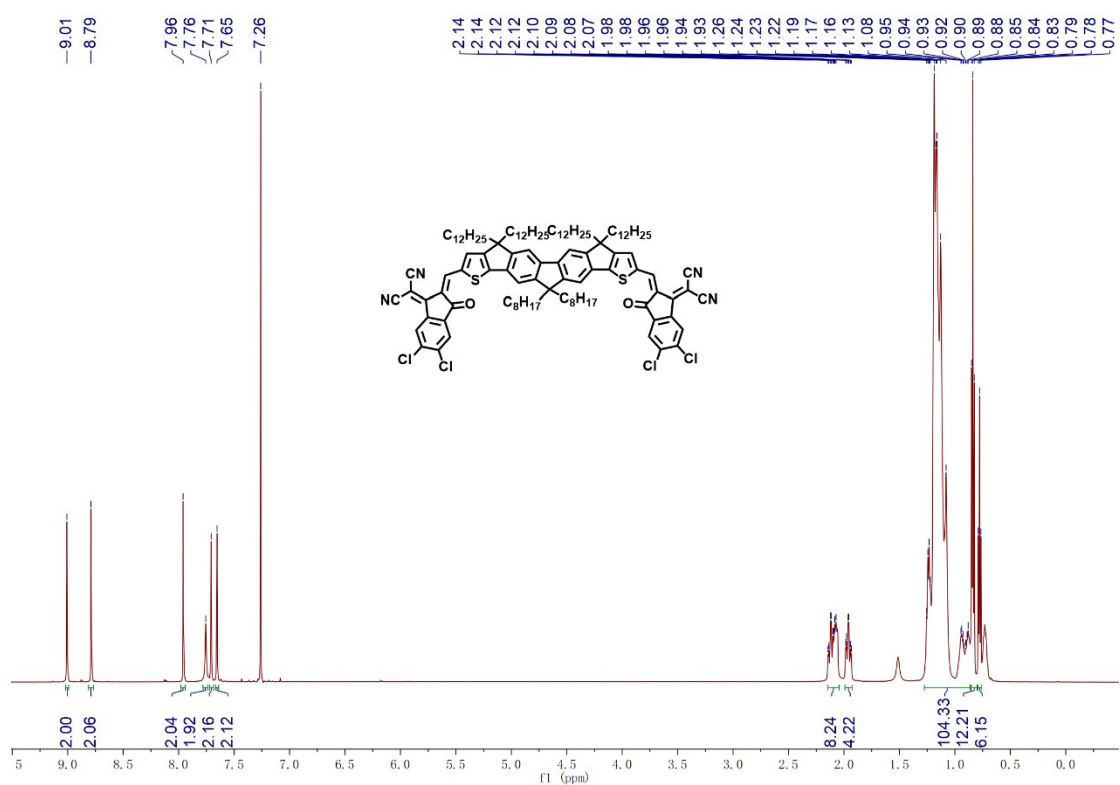

**Fig. S16**  $^1\text{H}$  NMR spectrum of FC12-2Cl in  $\text{CDCl}_3$ .

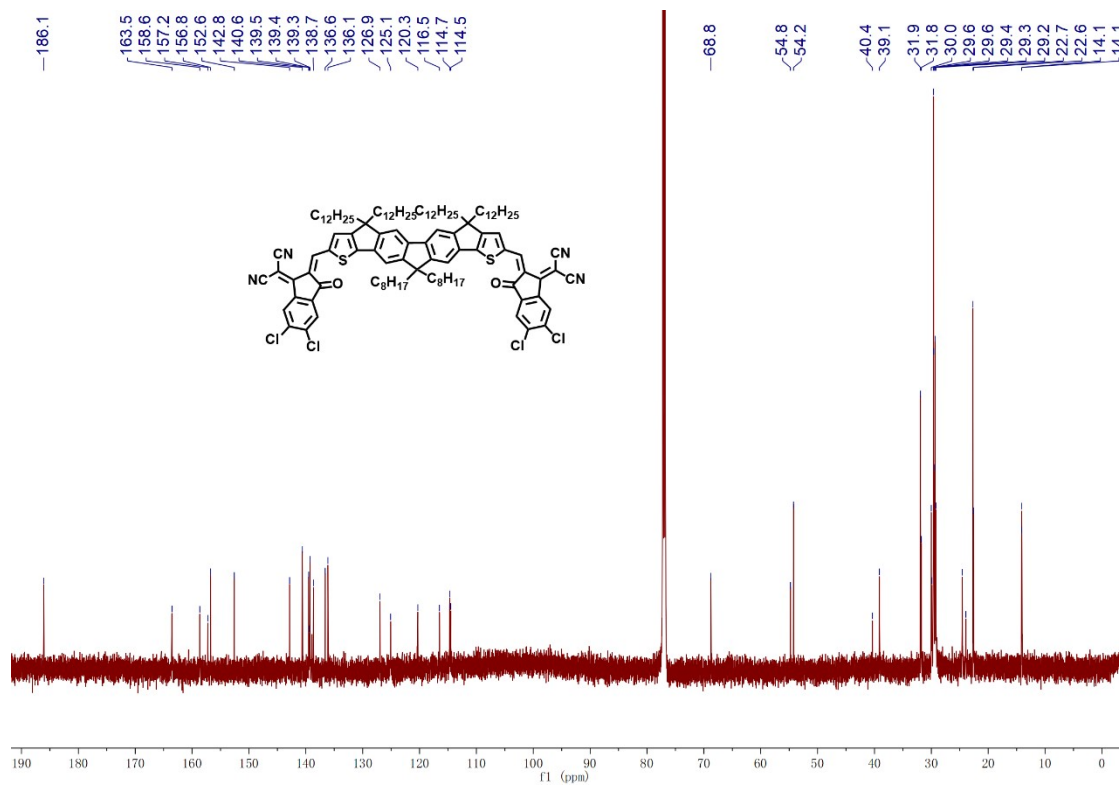

**Fig. S17** <sup>13</sup>C NMR spectrum of FC12-2Cl in CDCl<sub>3</sub>.

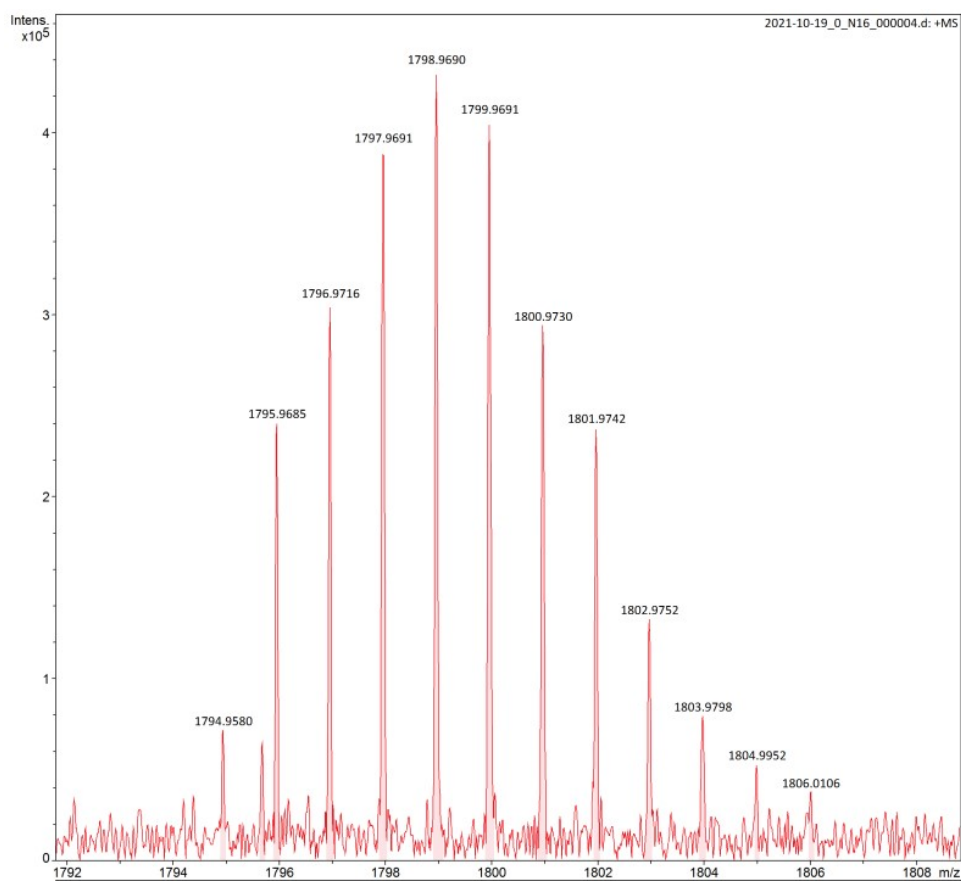

**Fig. S18** HR-MS spectrum of FC12-2Cl.

## 6. Reference

1. C.-Y. Chang; Y.-J. Cheng; S.-H. Hung; J.-S. Wu; W.-S. Kao; C.-H. Lee, C.-S. Hsu, *Adv Mater* 2012, **24**, 549-553.
2. N. L. Qiu; H. J. Zhang; X. J. Wan; C. X. Li; X. Ke; H. R. Feng; B. Kan; H. T. Zhang; Q. Zhang; Y. Lu, Y. S. Chen, *Adv Mater* 2017, **29**, 1604964.
3. Y. Wang; Y. Wang; B. Kan; X. Ke; X. Wan; C. Li, Y. Chen, *Adv Energy Mater* 2018, **8**, 1802021.
4. C. W. Tang, *Appl Phys Lett* 1986, **48**, 183-185.
5. H. Gommans; T. Aernouts; B. Verreet; P. Heremans; A. Medina; C. G. Claessens, T. Torres, *Adv Funct Mater* 2009, **19**, 3435-3439.
6. B. Verreet; B. P. Rand; D. Cheyns; A. Hadipour; T. Aernouts; P. Heremans; A. Medina; C. G. Claessens, T. Torres, *Adv Energy Mater* 2011, **1**, 565-568.
7. P. Sullivan; A. Duraud; I. Hancox; N. Beaumont; G. Mirri; J. H. R. Tucker; R. A. Hatton; M. Shipman, T. S. Jones, *Adv Energy Mater* 2011, **1**, 352-355.
8. J. Lee; D. Park; I. Heo, S. Yim, *Mater Res Bull* 2014, **58**, 132-135.
9. K. Cnops; B. P. Rand; D. Cheyns; B. Verreet; M. A. Empl, P. Heremans, *Nat Commun* 2014, **5**, 3406.
10. K.-W. Chen; C.-W. Huang; S.-Y. Lin; Y.-H. Liu; T. Chatterjee; W.-Y. Hung; S.-W. Liu, K.-T. Wong, *Org Electron* 2015, **26**, 319-326.
11. D. Park; I. H. Jung; S.-Y. Jang, S. Yim, *Macromol Res* 2019, **27**, 444-447.
12. Y. Liu; X. Wan; F. Wang; J. Zhou; G. Long; J. Tian; J. You; Y. Yang, Y. Chen, *Adv Energy Mater* 2011, **1**, 771-775.
13. B. Kan; M. Li; Q. Zhang; F. Liu; X. Wan; Y. Wang; W. Ni; G. Long; X. Yang; H. Feng; Y. Zuo; M. Zhang; F. Huang; Y. Cao; T. P. Russell, Y. Chen, *J Am Chem Soc* 2015, **137**, 3886-3893.
14. Y. Liu; X. Wan; F. Wang; J. Zhou; G. Long; J. Tian, Y. Chen, *Adv Mater* 2011, **23**, 5387-5391.
15. K. Sun; Z. Xiao; S. Lu; W. Zajaczkowski; W. Pisula; E. Hanssen; J. M. White; R. M. Williamson; J. Subbiah; J. Ouyang; A. B. Holmes; W. W. H. Wong, D. J. Jones, *Nat Commun* 2015, **6**,
16. H. Chen; D. Hu; Q. Yang; J. Gao; J. Fu; K. Yang; H. He; S. Chen; Z. Kan; T. Duan; C. Yang; J. Ouyang; Z. Xiao; K. Sun, S. Lu, *Joule* 2019, **3**, 3034-3047.
17. J. Qin; C. An; J. Zhang; K. Ma; Y. Yang; T. Zhang; S. Li; K. Xian; Y. Cui; Y. Tang; W. Ma; H. Yao; S. Zhang; B. Xu; C. He, J. Hou, *Sci China Mater* 2020, **63**, 1142-1150.
18. R. Zhou; Z. Jiang; C. Yang; J. Yu; J. Feng; M. A. Adil; D. Deng; W. Zou; J. Zhang; K. Lu; W. Ma; F. Gao, Z. Wei, *Nat Commun* 2019, **10**,
19. Q. Yue; H. Wu; Z. Zhou; M. Zhang; F. Liu, X. Zhu, *Adv Mater* 2019, **31**, e1904283.
20. L. Meng; M. Li; G. Lu; Z. Shen; S. Wu; H. Liang; Z. Li; G. Lu; Z. Yao; C. Li; X. Wan, Y. Chen, *Small* 2022, e2201400.
21. L. Meng; S. Wu; X. Wan; Z. Shen; M. Li; Y. Yang; J. Wang; G. Lu; Z. Ma; Z. Yao; C. Li, Y. Chen, *Chem Mater* 2022, **34**, 3168-3177.

22. L. Zhang; X. Zhu; D. Deng; Z. Wang; Z. Zhang; Y. Li; J. Zhang; K. Lv; L. Liu; X. Zhang; H. Zhou; H. Ade, Z. Wei, *Adv Mater* 2022, **34**, e2106316.
23. M. Jiang; H. Bai; H. Zhi; L. Yan; H. Y. Woo; L. Tong; J. Wang; F. Zhang, Q. An, *Energy Environ Sci* 2021, **14**, 3945-3953.
24. J. Qin; Z. Chen; P. Bi; Y. Yang; J. Zhang; Z. Huang; Z. Wei; C. An; H. Yao; X. Hao; T. Zhang; Y. Cui; L. Hong; C. Liu; Y. Zu; C. He, J. Hou, *Energy Environ Sci* 2021, **14**, 5903-5910.
